# Supplementary material for: The Effect of Cash Flow Presentation Method on Investors’ Forecast of Future Cash Flows
Source: Atypon-hosted journal article supplement (doi:10.1287/mnsc.2022.4406), 2022-04-26
Supplement: mnsc.2022.4406.sm1.pdf [file mnsc.2022.4406.sm1.pdf]

# **The effect of cash flow presentation method on investors' forecast of future cash flows**

## **Online Appendix: Consent Form and Experimental Instruments**

**Sompong Pornupatham**

Chulalongkorn Business School, Chulalongkorn University, sompong@cbs.chula.ac.th

**Hun-Tong Tan**

Nanyang Business School, Nanyang Technological University, ahttan@ntu.edu.sg

**Thanyaluk Vichitsarawong**

Chulalongkorn Business School, Chulalongkorn University, thanyaluk@cbs.chula.ac.th

**G-Song Yoo**

Korea University Business School, gsyoo@korea.ac.kr

## Consent Form

Purpose and Procedure: This study is intended to assess how investors make their operating cash flows estimates. If you agree to take part in this research, we would like you to assume the role of an investor for a listed company. You will be asked to make judgments based on the enclosed materials. Please open the envelopes and answer questions in the given sequence. Please do not skip questions or move ahead to other pages before completing the earlier pages. Once you have answered a question, do not go back and change your responses to previous questions. This will take about 20-30 minutes.

Voluntary participation: Your participation in this research is voluntary. You may refuse to participate, discontinue participation, or skip any questions you don't wish to answer at any time without penalty or loss of the benefits to which you are otherwise entitled. Your decision will not affect your grades or status at this university.

Risks and Benefits: You will not experience any discomfort. Other than receiving the payment in exchange for your participation, you will not receive any direct benefits from participating in this research. The most direct benefit you will receive from your participation in this study is that you can acquire first-hand knowledge of the research process.

Compensation: In return for your participation, you will receive Baht 100.

Confidentiality: To protect the confidentiality of your responses, your responses will be password protected. Only the researchers of this project will have access to your responses. In the event of publication of this research, no personally identifying information will be disclosed. To make sure your participation is confidential, please do not provide any personally identifying information on the questionnaires and place your signed consent form and completed tests in separate envelopes.

Who to Contact with Questions: Questions about this research study should be directed to the primary investigator and person in charge XXXX. They can be reached at XXXX and XXXX. Questions about your rights as a research participant should be directed to XXXX. You will receive a copy of this consent form.

I understand the procedures described above. My questions have been answered to my satisfaction, and I acknowledge that I am participating in this study of my own free will. I understand that I may refuse to participate or stop participating at any time.

Please print name: \_\_\_\_\_

Signature: \_\_\_\_\_ Date: \_\_\_\_\_

## [Experimental Instrument for Experiment 1]

Case 1: Indirect method / Accrued expenses

Case 2: Direct method / Absent

Case 3: Indirect method / Absent

Case 4: Direct method / Accrued Expense

Case 5: Direct method / Cash Expense

Case 6: Indirect method / Cash Expense

Case 7: Direct-plus-Indirect method / Accrued Expense

[This is instrument for all cases]

In this exercise, we would like you to analyze the enclosed case as an investor. Please answer the questions in the given sequence.

Please indicate the time now: \_\_\_\_\_

### Background Information

#### ADVANCE INC. BACKGROUND INFORMATION

##### BUSINESS

The Company's principal products are household products and appliances.

##### MARKETS AND DISTRIBUTIONS

The major markets for Advance's products are to domestic and foreign customers. The Company's suppliers are plastic, wood and metal manufacturers in Thailand and China.

##### FINANCE AND OPERATIONS

The company has experienced growing operating incomes over the past years and management expects continuing sales growth in the future. The company's CEO is planning to expand the factory to increase the production capacity in order to satisfy increasing orders from both domestic and oversea customers.

In 20x5, a board member retired. He had not been actively involved with the company in recent years. The company awarded a cash retirement package to him during the year. [the accrued expense case] It was accrued in the same year (20x5) and would be paid in 20x6. [the cash expense case] It was paid in the same year (20x5). The company will appoint a new member in 20x6.

## Case 1: Indirect method / Accrued expenses

Million  
Baht

### Income Statement

| Line |                                    | 20x5 | 20x4 | 20x3 | 20x2 | 20x1 |
|------|------------------------------------|------|------|------|------|------|
| 1    | Sales                              | 850  | 790  | 740  | 685  | 650  |
| 2    | Cost of sales                      | -330 | -300 | -280 | -260 | -250 |
| 3    | Gross Profit                       | 520  | 490  | 460  | 425  | 400  |
| 4    | Selling and Administrative expense | -350 | -330 | -305 | -290 | -290 |
| 5    | Management Compensation            | -130 | -67  | -64  | -62  | -60  |
| 6    | Net Income                         | 40   | 93   | 91   | 73   | 50   |

### Statement of Financial Position

|    | Assets                             | 20x5  | 20x4  | 20x3  | 20x2  | 20x1  |
|----|------------------------------------|-------|-------|-------|-------|-------|
| 7  | Cash                               | 977   | 759   | 558   | 385   | 220   |
| 8  | Accounts receivable, net           | 740   | 590   | 450   | 320   | 200   |
| 9  | Inventory                          | 175   | 160   | 150   | 140   | 130   |
| 10 | Property, plant and equipment, net | 650   | 750   | 850   | 940   | 1,020 |
| 11 | Intangible Assets, net             | 410   | 510   | 600   | 660   | 730   |
| 12 | Other assets                       | 255   | 205   | 140   | 90    | 50    |
| 13 | Total Assets                       | 3,207 | 2,974 | 2,748 | 2,535 | 2,350 |

### Liability and shareholders' equity

|    |                                          |       |       |       |       |       |
|----|------------------------------------------|-------|-------|-------|-------|-------|
| 14 | Accounts payable                         | 750   | 620   | 490   | 370   | 260   |
| 15 | Accrued expenses                         | 130   | 67    | 64    | 62    | 60    |
| 16 | Share capital                            | 1,500 | 1,500 | 1,500 | 1,500 | 1,500 |
| 17 | Retained earnings                        | 787   | 694   | 603   | 530   | 480   |
| 18 | Net income                               | 40    | 93    | 91    | 73    | 50    |
| 19 | Total Liability and shareholders' equity | 3,207 | 2,974 | 2,748 | 2,535 | 2,350 |

### Statement of Cash Flows

Million  
Baht

| Line | Operating Cash Flows                       | 20x6 | 20x5 | 20x4 | 20x3 | 20x2 | 20x1 |
|------|--------------------------------------------|------|------|------|------|------|------|
| 20   | Net income                                 |      | 40   | 93   | 91   | 73   | 50   |
| 21   | Add depreciation                           |      | 100  | 100  | 90   | 80   | 80   |
| 22   | amortization                               |      | 100  | 90   | 60   | 70   | 70   |
| 23   | (Increase) decrease in other assets        |      | -50  | -65  | -50  | -40  | -50  |
| 24   | (Increase) decrease in accounts receivable |      | -150 | -140 | -130 | -120 | -110 |
| 25   | (Increase) decrease in inventory           |      | -15  | -10  | -10  | -10  | -10  |
| 26   | Increase (decrease) in accounts payable    |      | 130  | 130  | 120  | 110  | 120  |
| 27   | Increase (decrease) in accrued expenses    |      | 63   | 3    | 2    | 2    | -    |

|    |                                      |                      |            |            |            |            |            |
|----|--------------------------------------|----------------------|------------|------------|------------|------------|------------|
| 28 | Cash flows from operating activities | <input type="text"/> | <u>218</u> | <u>201</u> | <u>173</u> | <u>165</u> | <u>150</u> |
|    | Net cash increase (decrease)         |                      | 218        | 201        | 173        | 165        | 150        |
| 29 | Beginning cash                       |                      | <u>759</u> | <u>558</u> | <u>385</u> | <u>220</u> | <u>70</u>  |
| 30 | Ending Cash                          |                      | <u>977</u> | <u>759</u> | <u>558</u> | <u>385</u> | <u>220</u> |

**Note:** For the ease of references, we provide only cash flow from operation.

# **Section A**



2) Indicate your confidence with respect to your estimate of Advance Inc.'s operating cash flow in Question 1 (*Circle a number*).

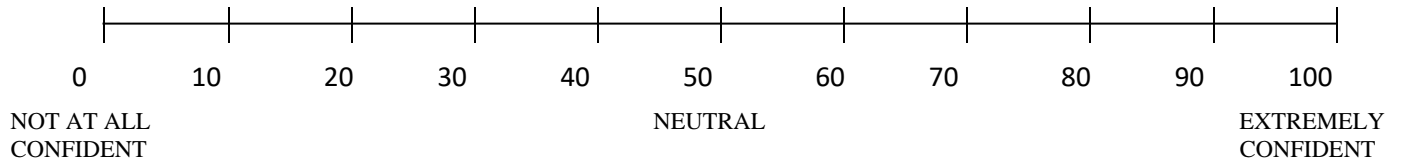

3) To what extent did you find it difficult to predict Advance Inc.'s 20x6 operating cash flow? (*Circle a number*)

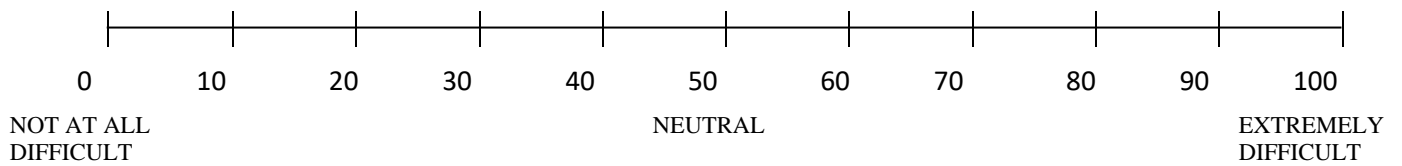

**When you are done, please insert this sheet into the envelope. Then begin completing Section B.**

# **Section B**

**SECTION B**

1) Please estimate all of the following accounts for the year 20x6 (*Fill in the blank*).

a) Sales (Line item 1) = \_\_\_\_\_

In the space below, show the basis for your answer above.

.....  
.....  
.....  
.....  
.....

b) Management compensation (Line item 5) = \_\_\_\_\_

In the space below, show the basis for your answer above.

.....  
.....  
.....  
.....  
.....

c) Accounts receivable (Line item 8) = \_\_\_\_\_

In the space below, show the basis for your answer above.

.....  
.....  
.....  
.....  
.....

d) Accrued expenses (Line item 15) = \_\_\_\_\_

In the space below, show the basis for your answer above.

.....  
.....  
.....  
.....  
.....

**Please indicate the time now: \_\_\_\_\_**

**When you are done, please insert this sheet into the envelope. Then begin completing Section C.**

# **Section C**

**SECTION C**

1. Please indicate what accounting method Advance Inc. used to prepare the operating cash flow (*Circle one*).

- a) Direct method
- b) Indirect method
- c) Direct method with the reconciliation of net income to operating cash flow

**Please turn to the next page.**

**Please answer the following background information about yourself.**

1. What is your gender? (*Circle one*) Male / Female
2. What is your occupation? (*Fill in the blank*) \_\_\_\_\_
3. How many years of working experience do you have? (*Fill in the blank*) \_\_\_\_\_  
years
4. In the space below, indicate the number of courses you have taken or currently enrolled in:

Accounting: \_\_\_\_\_ courses

Finance: \_\_\_\_\_ courses

5. How frequently do you read companies' earnings releases (or announcements)? (*Circle a number*)

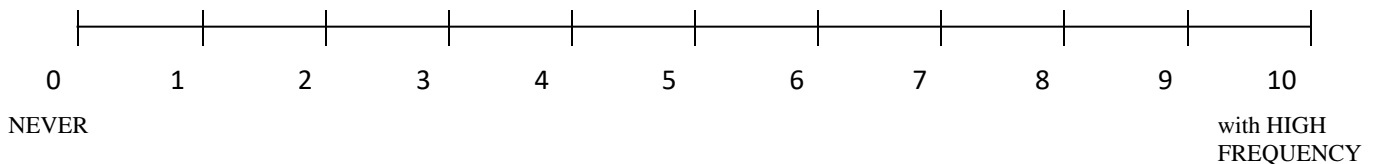

6. How frequently do you read companies' annual reports? (*Circle a number*)

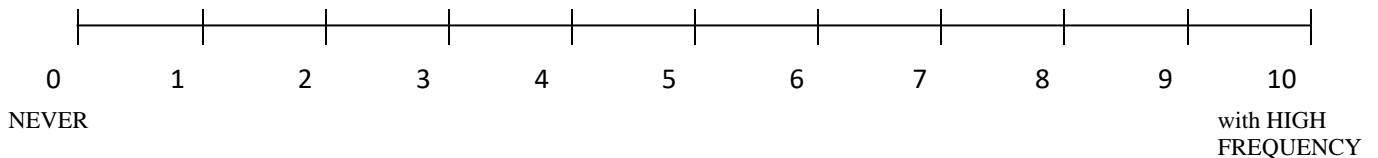

7. Have you ever invested in the stock market? (*Circle one*) YES / NO

If your answer is "yes," how many times have you done that? \_\_\_\_\_ times

If your answer is "no," do you intend to do it in the future? YES / NO

**Case 2: Direct method / Absent**

Million  
Baht

| <b>Income Statement</b> |                                    | <b>20x5</b> | <b>20x4</b> | <b>20x3</b> | <b>20x2</b> | <b>20x1</b> |
|-------------------------|------------------------------------|-------------|-------------|-------------|-------------|-------------|
| <b>Line</b>             |                                    |             |             |             |             |             |
| 1                       | Sales                              | 850         | 790         | 740         | 685         | 650         |
| 2                       | Cost of sales                      | -330        | -300        | -280        | -260        | -250        |
| 3                       | Gross Profit                       | 520         | 490         | 460         | 425         | 400         |
| 4                       | Selling and Administrative expense | -350        | -330        | -305        | -290        | -290        |
| 5                       | Management Compensation            | -70         | -67         | -64         | -62         | -60         |
| 6                       | Net Income                         | 100         | 93          | 91          | 73          | 50          |

**Statement of Financial Position**

| <b>Assets</b> |                                    | <b>20x5</b> | <b>20x4</b> | <b>20x3</b> | <b>20x2</b> | <b>20x1</b> |
|---------------|------------------------------------|-------------|-------------|-------------|-------------|-------------|
| 7             | Cash                               | 977         | 759         | 558         | 385         | 220         |
| 8             | Accounts receivable, net           | 740         | 590         | 450         | 320         | 200         |
| 9             | Inventory                          | 175         | 160         | 150         | 140         | 130         |
| 10            | Property, plant and equipment, net | 650         | 750         | 850         | 940         | 1,020       |
| 11            | Intangible Assets, net             | 410         | 510         | 600         | 660         | 730         |
| 12            | Other assets                       | 255         | 205         | 140         | 90          | 50          |
| 13            | Total Assets                       | 3,207       | 2,974       | 2,748       | 2,535       | 2,350       |

**Liability and shareholders' equity**

|    |                                          |       |       |       |       |       |
|----|------------------------------------------|-------|-------|-------|-------|-------|
| 14 | Accounts payable                         | 750   | 620   | 490   | 370   | 260   |
| 15 | Accrued expenses                         | 70    | 67    | 64    | 62    | 60    |
| 16 | Share capital                            | 1,500 | 1,500 | 1,500 | 1,500 | 1,500 |
| 17 | Retained earnings                        | 787   | 694   | 603   | 530   | 480   |
| 18 | Net income                               | 100   | 93    | 91    | 73    | 50    |
| 19 | Total Liability and shareholders' equity | 3,207 | 2,974 | 2,748 | 2,535 | 2,350 |

Million  
Baht

**Statement of Cash Flows**

| <b>Operating Cash Flows</b> |                                          | <b>20x6</b>          | <b>20x5</b> | <b>20x4</b> | <b>20x3</b> | <b>20x2</b> | <b>20x1</b> |
|-----------------------------|------------------------------------------|----------------------|-------------|-------------|-------------|-------------|-------------|
| <b>Line</b>                 |                                          |                      |             |             |             |             |             |
| 20                          | Cash receipt from customers              | 700                  | 650         | 610         | 565         | 540         |             |
| 21                          | Cash payment to suppliers                | -215                 | -180        | -170        | -160        | -140        |             |
| 22                          | Cash payment for expenses                | -197                 | -202        | -203        | -178        | -190        |             |
| 23                          | Cash payment for management compensation | -70                  | -67         | -64         | -62         | -60         |             |
| 24                          | Cash flows from operating activities     | <input type="text"/> | 218         | 201         | 173         | 165         | 150         |
|                             | Net cash increase (decrease)             |                      | 218         | 201         | 173         | 165         | 150         |
| 25                          | Beginning cash                           |                      | 759         | 558         | 385         | 220         | 70          |
| 26                          | Ending Cash                              |                      | 977         | 759         | 558         | 385         | 220         |

**Note:** For the ease of references, we provide only cash flow from operation.

### Case 3: Indirect method / Absent

Million  
Baht

| <b>Income Statement</b> |                                    | <b>20x5</b> | <b>20x4</b> | <b>20x3</b> | <b>20x2</b> | <b>20x1</b> |
|-------------------------|------------------------------------|-------------|-------------|-------------|-------------|-------------|
| <b>Line</b>             |                                    |             |             |             |             |             |
| 1                       | Sales                              | 850         | 790         | 740         | 685         | 650         |
| 2                       | Cost of sales                      | -330        | -300        | -280        | -260        | -250        |
| 3                       | Gross Profit                       | 520         | 490         | 460         | 425         | 400         |
| 4                       | Selling and Administrative expense | -350        | -330        | -305        | -290        | -290        |
| 5                       | Management Compensation            | -70         | -67         | -64         | -62         | -60         |
| 6                       | Net Income                         | 100         | 93          | 91          | 73          | 50          |

### Statement of Financial Position

| <b>Assets</b> |                                    | <b>20x5</b> | <b>20x4</b> | <b>20x3</b> | <b>20x2</b> | <b>20x1</b> |
|---------------|------------------------------------|-------------|-------------|-------------|-------------|-------------|
| <b>Line</b>   |                                    |             |             |             |             |             |
| 7             | Cash                               | 977         | 759         | 558         | 385         | 220         |
| 8             | Accounts receivable, net           | 740         | 590         | 450         | 320         | 200         |
| 9             | Inventory                          | 175         | 160         | 150         | 140         | 130         |
| 10            | Property, plant and equipment, net | 650         | 750         | 850         | 940         | 1,020       |
| 11            | Intangible Assets, net             | 410         | 510         | 600         | 660         | 730         |
| 12            | Other assets                       | 255         | 205         | 140         | 90          | 50          |
| 13            | Total Assets                       | 3,207       | 2,974       | 2,748       | 2,535       | 2,350       |

### Liability and shareholders' equity

|             |                                          |       |       |       |       |       |
|-------------|------------------------------------------|-------|-------|-------|-------|-------|
| <b>Line</b> |                                          |       |       |       |       |       |
| 14          | Accounts payable                         | 750   | 620   | 490   | 370   | 260   |
| 15          | Accrued expenses                         | 70    | 67    | 64    | 62    | 60    |
| 16          | Share capital                            | 1,500 | 1,500 | 1,500 | 1,500 | 1,500 |
| 17          | Retained earnings                        | 787   | 694   | 603   | 530   | 480   |
| 18          | Net income                               | 100   | 93    | 91    | 73    | 50    |
| 19          | Total Liability and shareholders' equity | 3,207 | 2,974 | 2,748 | 2,535 | 2,350 |

### Statement of Cash Flows

Million  
Baht

| <b>Operating Cash Flows</b> |                                            | <b>20x6</b> | <b>20x5</b> | <b>20x4</b> | <b>20x3</b> | <b>20x2</b> | <b>20x1</b> |
|-----------------------------|--------------------------------------------|-------------|-------------|-------------|-------------|-------------|-------------|
| <b>Line</b>                 |                                            |             |             |             |             |             |             |
| 20                          | Net income                                 | 100         | 93          | 91          | 73          | 50          |             |
| 21                          | Add depreciation                           | 100         | 100         | 90          | 80          | 80          |             |
| 22                          | amortization                               | 100         | 90          | 60          | 70          | 70          |             |
| 23                          | (Increase) decrease in other assets        | -50         | -65         | -50         | -40         | -50         |             |
| 24                          | (Increase) decrease in accounts receivable | -150        | -140        | -130        | -120        | -110        |             |
| 25                          | (Increase) decrease in inventory           | -15         | -10         | -10         | -10         | -10         |             |
| 26                          | Increase (decrease) in accounts payable    | 130         | 130         | 120         | 110         | 120         |             |
| 27                          | Increase (decrease) in accrued expenses    | 3           | 3           | 2           | 2           | -           |             |
| 28                          | Cash flows from operating activities       | 218         | 201         | 173         | 165         | 150         |             |

|    |                              |            |            |            |            |            |
|----|------------------------------|------------|------------|------------|------------|------------|
|    | Net cash increase (decrease) | 218        | 201        | 173        | 165        | 150        |
| 29 | Beginning cash               | 759        | 558        | 385        | 220        | 70         |
| 30 | Ending Cash                  | <u>977</u> | <u>759</u> | <u>558</u> | <u>385</u> | <u>220</u> |

**Note:** For the ease of references, we provide only cash flow from operation.

#### Case 4: Direct method / Accrued Expense

|                         |                                    | Million<br>Baht |             |             |             |             |
|-------------------------|------------------------------------|-----------------|-------------|-------------|-------------|-------------|
| <b>Income Statement</b> |                                    |                 |             |             |             |             |
| <b>Line</b>             |                                    | <b>20x5</b>     | <b>20x4</b> | <b>20x3</b> | <b>20x2</b> | <b>20x1</b> |
| 1                       | Sales                              | 850             | 790         | 740         | 685         | 650         |
| 2                       | Cost of sales                      | -330            | -300        | -280        | -260        | -250        |
| 3                       | Gross Profit                       | 520             | 490         | 460         | 425         | 400         |
| 4                       | Selling and Administrative expense | -350            | -330        | -305        | -290        | -290        |
| 5                       | Management Compensation            | -130            | -67         | -64         | -62         | -60         |
| 6                       | Net Income                         | 40              | 93          | 91          | 73          | 50          |

#### Statement of Financial Position

| <b>Assets</b> |                                    | <b>20x5</b> | <b>20x4</b> | <b>20x3</b> | <b>20x2</b> | <b>20x1</b> |
|---------------|------------------------------------|-------------|-------------|-------------|-------------|-------------|
| 7             | Cash                               | 977         | 759         | 558         | 385         | 220         |
| 8             | Accounts receivable, net           | 740         | 590         | 450         | 320         | 200         |
| 9             | Inventory                          | 175         | 160         | 150         | 140         | 130         |
| 10            | Property, plant and equipment, net | 650         | 750         | 850         | 940         | 1,020       |
| 11            | Intangible Assets, net             | 410         | 510         | 600         | 660         | 730         |
| 12            | Other assets                       | 255         | 205         | 140         | 90          | 50          |
| 13            | Total Assets                       | 3,207       | 2,974       | 2,748       | 2,535       | 2,350       |

#### Liability and shareholders' equity

|    |                                          |       |       |       |       |       |
|----|------------------------------------------|-------|-------|-------|-------|-------|
| 14 | Accounts payable                         | 750   | 620   | 490   | 370   | 260   |
| 15 | Accrued expenses                         | 130   | 67    | 64    | 62    | 60    |
| 16 | Share capital                            | 1,500 | 1,500 | 1,500 | 1,500 | 1,500 |
| 17 | Retained earnings                        | 787   | 694   | 603   | 530   | 480   |
| 18 | Net income                               | 40    | 93    | 91    | 73    | 50    |
| 19 | Total Liability and shareholders' equity | 3,207 | 2,974 | 2,748 | 2,535 | 2,350 |

#### Statement of Cash Flows

|             |                                          | Million<br>Baht |             |             |             |             |             |
|-------------|------------------------------------------|-----------------|-------------|-------------|-------------|-------------|-------------|
| <b>Line</b> |                                          | <b>20x6</b>     | <b>20x5</b> | <b>20x4</b> | <b>20x3</b> | <b>20x2</b> | <b>20x1</b> |
|             | Operating Cash Flows                     |                 |             |             |             |             |             |
| 20          | Cash receipt from customers              |                 | 700         | 650         | 610         | 565         | 540         |
| 21          | Cash payment to suppliers                |                 | -215        | -180        | -170        | -160        | -140        |
| 22          | Cash payment for expenses                |                 | -197        | -202        | -203        | -178        | -190        |
| 23          | Cash payment for management compensation |                 | -70         | -67         | -64         | -62         | -60         |
| 24          | Cash flows from operating activities     |                 | 218         | 201         | 173         | 165         | 150         |
|             | Net cash increase (decrease)             |                 | 218         | 201         | 173         | 165         | 150         |
| 25          | Beginning cash                           |                 | 759         | 558         | 385         | 220         | 70          |
| 26          | Ending Cash                              |                 | 977         | 759         | 558         | 385         | 220         |

**Note:** For the ease of references, we provide only cash flow from operation.

## Case 5: Direct method / Cash Expense

Million  
Baht

| <b>Income Statement</b> |                                    | <b>20x5</b> | <b>20x4</b> | <b>20x3</b> | <b>20x2</b> | <b>20x1</b> |
|-------------------------|------------------------------------|-------------|-------------|-------------|-------------|-------------|
| <b>Line</b>             |                                    |             |             |             |             |             |
| 1                       | Sales                              | 850         | 790         | 740         | 685         | 650         |
| 2                       | Cost of sales                      | -330        | -300        | -280        | -260        | -250        |
| 3                       | Gross Profit                       | 520         | 490         | 460         | 425         | 400         |
| 4                       | Selling and Administrative expense | -350        | -330        | -305        | -290        | -290        |
| 5                       | Management Compensation            | -130        | -67         | -64         | -62         | -60         |
| 6                       | Net Income                         | 40          | 93          | 91          | 73          | 50          |

### Statement of Financial Position

| <b>Assets</b> |                                    | <b>20x5</b> | <b>20x4</b> | <b>20x3</b> | <b>20x2</b> | <b>20x1</b> |
|---------------|------------------------------------|-------------|-------------|-------------|-------------|-------------|
| 7             | Cash                               | 917         | 759         | 558         | 385         | 220         |
| 8             | Accounts receivable, net           | 740         | 590         | 450         | 320         | 200         |
| 9             | Inventory                          | 175         | 160         | 150         | 140         | 130         |
| 10            | Property, plant and equipment, net | 650         | 750         | 850         | 940         | 1,020       |
| 11            | Intangible Assets, net             | 410         | 510         | 600         | 660         | 730         |
| 12            | Other assets                       | 255         | 205         | 140         | 90          | 50          |
| 13            | Total Assets                       | 3,147       | 2,974       | 2,748       | 2,535       | 2,350       |

### Liability and shareholders' equity

|    |                                          |       |       |       |       |       |
|----|------------------------------------------|-------|-------|-------|-------|-------|
| 14 | Accounts payable                         | 750   | 620   | 490   | 370   | 260   |
| 15 | Accrued expenses                         | 70    | 67    | 64    | 62    | 60    |
| 16 | Share capital                            | 1,500 | 1,500 | 1,500 | 1,500 | 1,500 |
| 17 | Retained earnings                        | 787   | 694   | 603   | 530   | 480   |
| 18 | Net income                               | 40    | 93    | 91    | 73    | 50    |
| 19 | Total Liability and shareholders' equity | 3,147 | 2,974 | 2,748 | 2,535 | 2,350 |

### Statement of Cash Flows

Million  
Baht

| <b>Operating Cash Flows</b> |                                          | <b>20x6</b>          | <b>20x5</b> | <b>20x4</b> | <b>20x3</b> | <b>20x2</b> | <b>20x1</b> |
|-----------------------------|------------------------------------------|----------------------|-------------|-------------|-------------|-------------|-------------|
| <b>Line</b>                 |                                          |                      |             |             |             |             |             |
| 20                          | Cash receipt from customers              | 700                  | 650         | 610         | 565         | 540         |             |
| 21                          | Cash payment to suppliers                | -215                 | -180        | -170        | -160        | -140        |             |
| 22                          | Cash payment for expenses                | -197                 | -202        | -203        | -178        | -190        |             |
| 23                          | Cash payment for management compensation | -130                 | -67         | -64         | -62         | -60         |             |
| 24                          | Cash flows from operating activities     | <input type="text"/> | 158         | 201         | 173         | 165         | 150         |
|                             | Net cash increase (decrease)             |                      | 158         | 201         | 173         | 165         | 150         |
| 25                          | Beginning cash                           |                      | 759         | 558         | 385         | 220         | 70          |
| 26                          | Ending Cash                              |                      | 917         | 759         | 558         | 385         | 220         |

**Note:** For the ease of references, we provide only cash flow from operation.

## Case 6: Indirect method / Cash Expense

Million  
Baht

| <b>Income Statement</b> |                                    | <b>20x5</b> | <b>20x4</b> | <b>20x3</b> | <b>20x2</b> | <b>20x1</b> |
|-------------------------|------------------------------------|-------------|-------------|-------------|-------------|-------------|
| <b>Line</b>             |                                    |             |             |             |             |             |
| 1                       | Sales                              | 850         | 790         | 740         | 685         | 650         |
| 2                       | Cost of sales                      | -330        | -300        | -280        | -260        | -250        |
| 3                       | Gross Profit                       | 520         | 490         | 460         | 425         | 400         |
| 4                       | Selling and Administrative expense | -350        | -330        | -305        | -290        | -290        |
| 5                       | Management Compensation            | -130        | -67         | -64         | -62         | -60         |
| 6                       | Net Income                         | 40          | 93          | 91          | 73          | 50          |

### Statement of Financial Position

| <b>Assets</b> |                                    | <b>20x5</b> | <b>20x4</b> | <b>20x3</b> | <b>20x2</b> | <b>20x1</b> |
|---------------|------------------------------------|-------------|-------------|-------------|-------------|-------------|
| <b>Line</b>   |                                    |             |             |             |             |             |
| 7             | Cash                               | 917         | 759         | 558         | 385         | 220         |
| 8             | Accounts receivable, net           | 740         | 590         | 450         | 320         | 200         |
| 9             | Inventory                          | 175         | 160         | 150         | 140         | 130         |
| 10            | Property, plant and equipment, net | 650         | 750         | 850         | 940         | 1,020       |
| 11            | Intangible Assets, net             | 410         | 510         | 600         | 660         | 730         |
| 12            | Other assets                       | 255         | 205         | 140         | 90          | 50          |
| 13            | Total Assets                       | 3,147       | 2,974       | 2,748       | 2,535       | 2,350       |

### Liability and shareholders' equity

|             |                                          |       |       |       |       |       |
|-------------|------------------------------------------|-------|-------|-------|-------|-------|
| <b>Line</b> |                                          |       |       |       |       |       |
| 14          | Accounts payable                         | 750   | 620   | 490   | 370   | 260   |
| 15          | Accrued expenses                         | 70    | 67    | 64    | 62    | 60    |
| 16          | Share capital                            | 1,500 | 1,500 | 1,500 | 1,500 | 1,500 |
| 17          | Retained earnings                        | 787   | 694   | 603   | 530   | 480   |
| 18          | Net income                               | 40    | 93    | 91    | 73    | 50    |
| 19          | Total Liability and shareholders' equity | 3,147 | 2,974 | 2,748 | 2,535 | 2,350 |

### Statement of Cash Flows

Million  
Baht

| <b>Operating Cash Flows</b> |                                            | <b>20x6</b> | <b>20x5</b> | <b>20x4</b> | <b>20x3</b> | <b>20x2</b> | <b>20x1</b> |
|-----------------------------|--------------------------------------------|-------------|-------------|-------------|-------------|-------------|-------------|
| <b>Line</b>                 |                                            |             |             |             |             |             |             |
| 20                          | Net income                                 | 40          | 93          | 91          | 73          | 50          |             |
| 21                          | Add depreciation                           | 100         | 100         | 90          | 80          | 80          |             |
| 22                          | amortization                               | 100         | 90          | 60          | 70          | 70          |             |
| 23                          | (Increase) decrease in other assets        | -50         | -65         | -50         | -40         | -50         |             |
| 24                          | (Increase) decrease in accounts receivable | -150        | -140        | -130        | -120        | -110        |             |
| 25                          | (Increase) decrease in inventory           | -15         | -10         | -10         | -10         | -10         |             |
| 26                          | Increase (decrease) in accounts payable    | 130         | 130         | 120         | 110         | 120         |             |
| 27                          | Increase (decrease) in accrued expenses    | 3           | 3           | 2           | 2           | -           |             |
| 28                          | Cash flows from operating activities       | 158         | 201         | 173         | 165         | 150         |             |
|                             | Net cash increase (decrease)               | 158         | 201         | 173         | 165         | 150         |             |

|    |                |            |            |            |            |            |
|----|----------------|------------|------------|------------|------------|------------|
| 29 | Beginning cash | 759        | 558        | 385        | 220        | 70         |
| 30 | Ending Cash    | <u>917</u> | <u>759</u> | <u>558</u> | <u>385</u> | <u>220</u> |

**Note:** For the ease of references, we provide only cash flow from operation.

## Case 7: Direct-plus-Indirect method / Accrued Expense

Million  
Baht

| <b>Income Statement</b> |                                    |             |             |             |             |             |
|-------------------------|------------------------------------|-------------|-------------|-------------|-------------|-------------|
| <b>Line</b>             |                                    | <b>20x5</b> | <b>20x4</b> | <b>20x3</b> | <b>20x2</b> | <b>20x1</b> |
| 1                       | Sales                              | 850         | 790         | 740         | 685         | 650         |
| 2                       | Cost of sales                      | -330        | -300        | -280        | -260        | -250        |
| 3                       | Gross Profit                       | 520         | 490         | 460         | 425         | 400         |
| 4                       | Selling and Administrative expense | -350        | -330        | -305        | -290        | -290        |
| 5                       | Management Compensation            | -130        | -67         | -64         | -62         | -60         |
| 6                       | Net Income                         | 40          | 93          | 91          | 73          | 50          |

### Statement of Financial Position

| <b>Assets</b> |                                    | <b>20x5</b> | <b>20x4</b> | <b>20x3</b> | <b>20x2</b> | <b>20x1</b> |
|---------------|------------------------------------|-------------|-------------|-------------|-------------|-------------|
| 7             | Cash                               | 977         | 759         | 558         | 385         | 220         |
| 8             | Accounts receivable, net           | 740         | 590         | 450         | 320         | 200         |
| 9             | Inventory                          | 175         | 160         | 150         | 140         | 130         |
| 10            | Property, plant and equipment, net | 650         | 750         | 850         | 940         | 1,020       |
| 11            | Intangible Assets, net             | 410         | 510         | 600         | 660         | 730         |
| 12            | Other assets                       | 255         | 205         | 140         | 90          | 50          |
| 13            | Total Assets                       | 3,207       | 2,974       | 2,748       | 2,535       | 2,350       |

| <b>Liability and shareholders' equity</b> |                                          |       |       |       |       |       |
|-------------------------------------------|------------------------------------------|-------|-------|-------|-------|-------|
| 14                                        | Accounts payable                         | 750   | 620   | 490   | 370   | 260   |
| 15                                        | Accrued expenses                         | 130   | 67    | 64    | 62    | 60    |
| 16                                        | Share capital                            | 1,500 | 1,500 | 1,500 | 1,500 | 1,500 |
| 17                                        | Retained earnings                        | 787   | 694   | 603   | 530   | 480   |
| 18                                        | Net income                               | 40    | 93    | 91    | 73    | 50    |
| 19                                        | Total Liability and shareholders' equity | 3,207 | 2,974 | 2,748 | 2,535 | 2,350 |

### Statement of Cash Flows

Million  
Baht

| <b>Operating Cash Flows</b> |                                          | <b>20x6</b> | <b>20x5</b> | <b>20x4</b> | <b>20x3</b> | <b>20x2</b> | <b>20x1</b> |
|-----------------------------|------------------------------------------|-------------|-------------|-------------|-------------|-------------|-------------|
| 20                          | Cash receipt from customers              |             | 700         | 650         | 610         | 565         | 540         |
| 21                          | Cash payment to suppliers                |             | -215        | -180        | -170        | -160        | -140        |
| 22                          | Cash payment for expenses                |             | -197        | -202        | -203        | -178        | -190        |
| 23                          | Cash payment for management compensation |             | -70         | -67         | -64         | -62         | -60         |
| 24                          | Cash flows from operating activities     |             | 218         | 201         | 173         | 165         | 150         |
|                             | Net cash increase (decrease)             |             | 218         | 201         | 173         | 165         | 150         |
| 25                          | Beginning cash                           |             | 759         | 558         | 385         | 220         | 70          |
| 26                          | Ending Cash                              |             | 977         | 759         | 558         | 385         | 220         |

Reconciliation from net income to operating cash flows

| <b>Line</b> | Operating Cash Flows                          | <b>20x6</b> | <b>20x5</b> | <b>20x4</b> | <b>20x3</b> | <b>20x2</b> | <b>20x1</b> |
|-------------|-----------------------------------------------|-------------|-------------|-------------|-------------|-------------|-------------|
| 27          | Net income                                    |             | 40          | 93          | 91          | 73          | 50          |
| 28          | Add depreciation                              |             | 100         | 100         | 90          | 80          | 80          |
| 29          | amortization                                  |             | 100         | 90          | 60          | 70          | 70          |
| 30          | (Increase) decrease in other assets           |             | -50         | -65         | -50         | -40         | -50         |
| 31          | (Increase) decrease in accounts<br>receivable |             | -150        | -140        | -130        | -120        | -110        |
| 32          | (Increase) decrease in inventory              |             | -15         | -10         | -10         | -10         | -10         |
| 33          | Increase (decrease) in accounts payable       |             | 130         | 130         | 120         | 110         | 120         |
| 34          | Increase (decrease) in accrued expenses       |             | 63          | 3           | 2           | 2           | -           |
| 35          | Cash flows from operating activities          |             | 218         | 201         | 173         | 165         | 150         |

**Note:** For the ease of references, we provide only cash flow from operation.

## **[Experimental Instrument for Experiment 2]**

**Case 1: Indirect method / Accrued expenses**

**Case 2: Direct method / Accrued expenses**

**Case 3: Indirect method / Cash expenses**

**Case 4: Direct method / Cash expenses**

[This is instrument for Cases 1 and 2]

In this exercise, we would like you to analyze the enclosed case as an investor. Please answer the questions in the given sequence.

**Please indicate the time now: \_\_\_\_\_**

### **Background Information**

#### **ADVANCE INC. BACKGROUND INFORMATION**

##### **BUSINESS**

The Company's principal products are household products and appliances.

##### **MARKETS AND DISTRIBUTIONS**

The major markets for Advance's products are to domestic and foreign customers. The Company's suppliers are plastic, wood and metal manufacturers in Thailand and China.

##### **FINANCE AND OPERATIONS**

The company has experienced growing operating incomes over the past years and management expects continuing sales growth in the future. The company's CEO is planning to expand the factory to increase the production capacity in order to satisfy increasing orders from both domestic and overseas customers. We have been renting a commercial building from a property investment company for our office since 20x1.

In April 20x5, we experienced severe flooding that affected our warehouses and, because of that, we temporarily rented one of our customers' warehouses for eight months during the fiscal year. The rental expenses payable (to the customer) were accrued in the same year (20x5) and would be paid in cash in 20x6. We vacated the premises at the end of 20x5.

## Case 1: Indirect method / Accrued expenses

|                                             |                                            | Million<br>Baht |       |       |       |       |
|---------------------------------------------|--------------------------------------------|-----------------|-------|-------|-------|-------|
| <b>Income Statement</b>                     |                                            |                 |       |       |       |       |
| Line                                        |                                            | 20x5            | 20x4  | 20x3  | 20x2  | 20x1  |
| 1                                           | Sales                                      | 850             | 790   | 740   | 685   | 650   |
| 2                                           | Cost of sales                              | -330            | -300  | -280  | -260  | -250  |
| 3                                           | Gross profit                               | 520             | 490   | 460   | 425   | 400   |
| 4                                           | Selling and administrative expenses        | -280            | -263  | -241  | -228  | -230  |
| 5                                           | Rental expenses                            | -130            | -67   | -64   | -62   | -60   |
| 6                                           | Net income                                 | 110             | 160   | 155   | 135   | 110   |
| <b>Statement of Financial Position</b>      |                                            |                 |       |       |       |       |
| <b>Assets</b>                               |                                            |                 |       |       |       |       |
|                                             |                                            | 20x5            | 20x4  | 20x3  | 20x2  | 20x1  |
| 7                                           | Cash                                       | 1,290           | 1,005 | 740   | 505   | 280   |
| 8                                           | Accounts receivable, net                   | 740             | 590   | 450   | 320   | 200   |
| 9                                           | Inventory                                  | 175             | 160   | 150   | 140   | 130   |
| 10                                          | Property, plant and equipment, net         | 650             | 750   | 850   | 940   | 1,020 |
| 11                                          | Intangible assets, net                     | 410             | 510   | 600   | 660   | 730   |
| 12                                          | Other assets                               | 325             | 272   | 204   | 152   | 110   |
| 13                                          | Total assets                               | 3,590           | 3,287 | 2,994 | 2,717 | 2,470 |
| <b>Liabilities and shareholders' equity</b> |                                            |                 |       |       |       |       |
| 14                                          | Accounts payable                           | 750             | 620   | 490   | 370   | 260   |
| 15                                          | Rental expenses payable                    | 130             | 67    | 64    | 62    | 60    |
| 16                                          | Share capital                              | 1,500           | 1,500 | 1,500 | 1,500 | 1,500 |
| 17                                          | Retained earnings                          | 1,100           | 940   | 785   | 650   | 540   |
| 18                                          | Net income                                 | 110             | 160   | 155   | 135   | 110   |
| 19                                          | Total liabilities and shareholders' equity | 3,590           | 3,287 | 2,994 | 2,717 | 2,470 |

| <b>Statement of Cash Flows</b> |                                                |             |             |             |             | Million<br>Baht |             |
|--------------------------------|------------------------------------------------|-------------|-------------|-------------|-------------|-----------------|-------------|
| <b>Line</b>                    | <b>Operating Cash Flows</b>                    | <b>20X6</b> | <b>20x5</b> | <b>20x4</b> | <b>20x3</b> | <b>20x2</b>     | <b>20x1</b> |
| 20                             | Net income                                     |             | 110         | 160         | 155         | 135             | 110         |
| 21                             | Add depreciation                               |             | 100         | 100         | 90          | 80              | 80          |
| 22                             | amortization                                   |             | 100         | 90          | 60          | 70              | 70          |
| 23                             | (Increase) decrease in account receivable      |             | -150        | -140        | -130        | -120            | -110        |
| 24                             | (Increase) decrease in inventory               |             | -15         | -10         | -10         | -10             | -10         |
| 25                             | (Increase) decrease in other assets            |             | -53         | -68         | -52         | -42             | -50         |
| 26                             | Increase (decrease) in account payable         |             | 130         | 130         | 120         | 110             | 120         |
| 27                             | Increase (decrease) in rental expenses payable |             | 63          | 3           | 2           | 2               | -           |
| 28                             | Cash flows from operating activities           |             | <u>285</u>  | <u>265</u>  | <u>235</u>  | <u>225</u>      | <u>210</u>  |

**Note:** For the ease of references, we provide only cash flow from operation.

# **Section A**



5) Indicate your confidence with respect to your estimate of Advance Inc.'s operating cash flow in Question 1 (*Circle a number*).

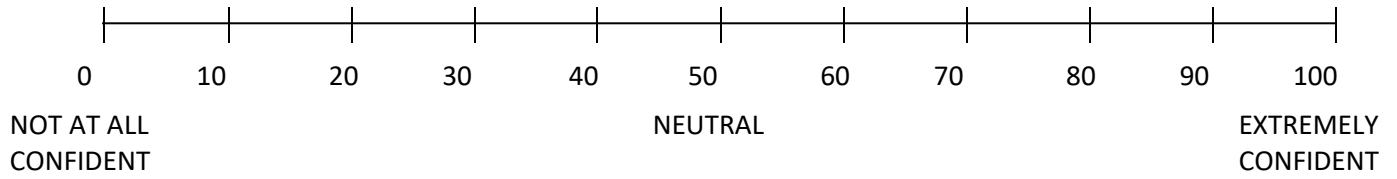

6) To what extent did you find it difficult to predict Advance Inc.'s 20x6 operating cash flow? (*Circle a number*)

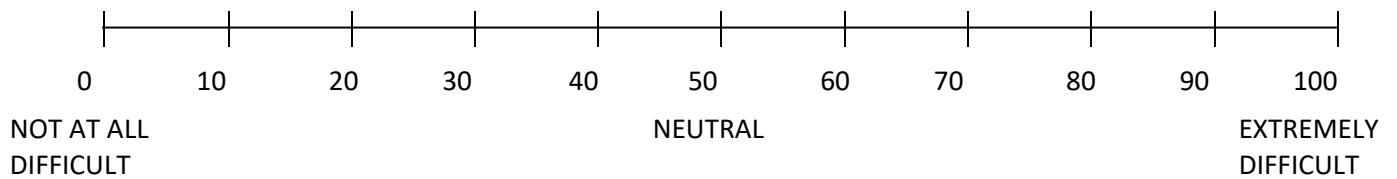

**When you are done, please insert this sheet into the envelope. Then begin completing Section B.**

# **Section B**

**SECTION B**

2) Please estimate all of the following accounts for the year 20x6 (*Fill in the blank*).

e) Sales (Line item 1) = \_\_\_\_\_

In the space below, show the basis for your answer above.

.....  
.....  
.....  
.....  
.....

f) Rental expenses (Line item 5) = \_\_\_\_\_

In the space below, show the basis for your answer above.

.....  
.....  
.....  
.....  
.....

g) Accounts receivable (Line item 8) = \_\_\_\_\_

In the space below, show the basis for your answer above.

.....  
.....  
.....  
.....  
.....

h) Rental expenses payable (Line item 15) = \_\_\_\_\_

In the space below, show the basis for your answer above.

.....  
.....  
.....  
.....  
.....  
.....

**Please indicate the time now:** \_\_\_\_\_

**When you are done, please insert this sheet into the envelope. Then begin completing Section C.**

# **Section C**

**SECTION C**

2. Please indicate what accounting method Advance Inc. used to prepare the operating cash flow (*Circle one*).

- d) Direct method
- e) Indirect method

**Please turn to the next page.**

**Please answer the following background information about yourself.**

8. What is your gender? (*Circle one*) Male / Female

9. What is your occupation? (*Fill in the blank*) \_\_\_\_\_

10. How many years of working experience do you have? (*Fill in the blank*) \_\_\_\_\_  
years

11. In the space below, indicate the number of courses you have taken or currently enrolled in:

Accounting: \_\_\_\_\_ courses

Finance: \_\_\_\_\_ courses

12. How frequently do you read companies' earnings releases (or announcements)? (*Circle a number*)

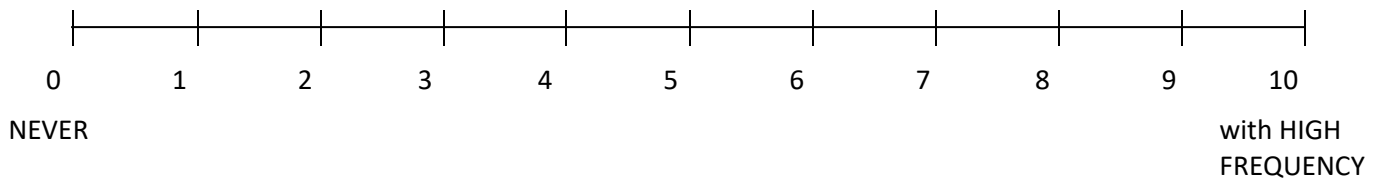

13. How frequently do you read companies' annual reports? (*Circle a number*)

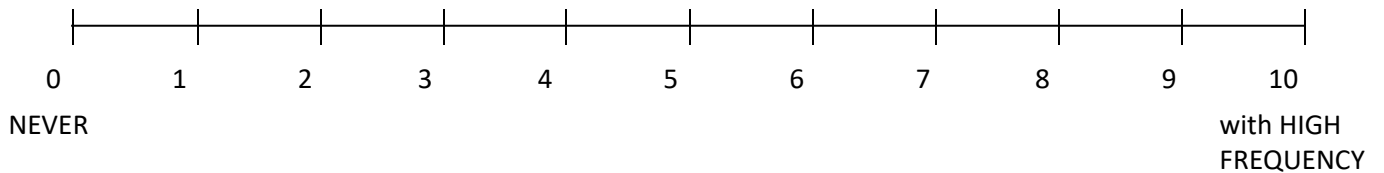

14. Have you ever invested in the stock market? (*Circle one*) YES / NO

If your answer is "yes," how many times have you done that? \_\_\_\_\_ times

If your answer is "no," do you intend to do it in the future? YES / NO

## Case 2: Direct method / Accrued expenses

|                                             |                                            | Million Baht |             |             |             |             |
|---------------------------------------------|--------------------------------------------|--------------|-------------|-------------|-------------|-------------|
| <b>Income Statement</b>                     |                                            | <b>20x5</b>  | <b>20x4</b> | <b>20x3</b> | <b>20x2</b> | <b>20x1</b> |
| Line                                        |                                            |              |             |             |             |             |
| 1                                           | Sales                                      | 850          | 790         | 740         | 685         | 650         |
| 2                                           | Cost of sales                              | -330         | -300        | -280        | -260        | -250        |
| 3                                           | Gross profit                               | 520          | 490         | 460         | 425         | 400         |
| 4                                           | Selling and administrative expenses        | -280         | -263        | -241        | -228        | -230        |
| 5                                           | Rental expenses                            | -130         | -67         | -64         | -62         | -60         |
| 6                                           | Net income                                 | 110          | 160         | 155         | 135         | 110         |
| <b>Statement of Financial Position</b>      |                                            |              |             |             |             |             |
| <b>Assets</b>                               |                                            | <b>20x5</b>  | <b>20x4</b> | <b>20x3</b> | <b>20x2</b> | <b>20x1</b> |
| 7                                           | Cash                                       | 1,290        | 1,005       | 740         | 505         | 280         |
| 8                                           | Accounts receivable, net                   | 740          | 590         | 450         | 320         | 200         |
| 9                                           | Inventory                                  | 175          | 160         | 150         | 140         | 130         |
| 10                                          | Property, plant and equipment, net         | 650          | 750         | 850         | 940         | 1,020       |
| 11                                          | Intangible assets, net                     | 410          | 510         | 600         | 660         | 730         |
| 12                                          | Other assets                               | 325          | 272         | 204         | 152         | 110         |
| 13                                          | Total assets                               | 3,590        | 3,287       | 2,994       | 2,717       | 2,470       |
| <b>Liabilities and shareholders' equity</b> |                                            |              |             |             |             |             |
| 14                                          | Accounts payable                           | 750          | 620         | 490         | 370         | 260         |
| 15                                          | Rental expenses payable                    | 130          | 67          | 64          | 62          | 60          |
| 16                                          | Share capital                              | 1,500        | 1,500       | 1,500       | 1,500       | 1,500       |
| 17                                          | Retained earnings                          | 1,100        | 940         | 785         | 650         | 540         |
| 18                                          | Net income                                 | 110          | 160         | 155         | 135         | 110         |
| 19                                          | Total liabilities and shareholders' equity | 3,590        | 3,287       | 2,994       | 2,717       | 2,470       |

| Statement of Cash Flows |                                      | Million Baht |       |       |      |      |      |
|-------------------------|--------------------------------------|--------------|-------|-------|------|------|------|
|                         |                                      | 20x6         | 20x5  | 20x4  | 20x3 | 20x2 | 20x1 |
| <b>Line</b>             | Operating Cash Flows                 |              |       |       |      |      |      |
| 20                      | Cash receipt from customers          |              | 700   | 650   | 610  | 565  | 540  |
| 21                      | Cash payment to suppliers            |              | -215  | -180  | -170 | -160 | -140 |
| 22                      | Cash payment for rental expenses     |              | -67   | -64   | -62  | -60  | -60  |
| 23                      | Cash payment for other expenses      |              | -133  | -141  | -143 | -120 | -130 |
| 24                      | Cash flows from operating activities |              | 285   | 265   | 235  | 225  | 210  |
|                         | Net cash increase (decrease)         |              | 285   | 265   | 235  | 225  | 210  |
| 25                      | Beginning cash                       |              | 1,005 | 740   | 505  | 280  | 70   |
| 26                      | Ending cash                          |              | 1,290 | 1,005 | 740  | 505  | 280  |

**Note:** For the ease of references, we provide only cash flow from operation.

[This is instrument for Cases 3 and 4]

In this exercise, we would like you to analyze the enclosed case as an investor.

Please answer the questions in the given sequence.

Please indicate the time now: \_\_\_\_\_

### **Background Information**

#### **ADVANCE INC. BACKGROUND INFORMATION**

##### **BUSINESS**

The Company's principal products are household products and appliances.

##### **MARKETS AND DISTRIBUTIONS**

The major markets for Advance's products are to domestic and foreign customers. The Company's suppliers are plastic, wood and metal manufacturers in Thailand and China.

##### **FINANCE AND OPERATIONS**

The company has experienced growing operating incomes over the past years and management expects continuing sales growth in the future. The company's CEO is planning to expand the factory to increase the production capacity in order to satisfy increasing orders from both domestic and overseas customers. We have been renting a commercial building from a property investment company for our office since 20x1.

In April 20x5, we experienced severe flooding that affected our warehouses and, because of that, we temporarily rented one of our customers' warehouses for eight months during the fiscal year. The rental expenses (to the customer) were paid in cash in the same year (20x5). We vacated the premises at the end of 20x5.

### Case 3: Indirect method / Cash expenses

Million Baht

| <b>Income Statement</b>                     |                                            | <b>20x5</b> | <b>20x4</b> | <b>20x3</b> | <b>20x2</b> | <b>20x1</b> |
|---------------------------------------------|--------------------------------------------|-------------|-------------|-------------|-------------|-------------|
| <b>Line</b>                                 |                                            |             |             |             |             |             |
| 1                                           | Sales                                      | 850         | 790         | 740         | 685         | 650         |
| 2                                           | Cost of sales                              | -330        | -300        | -280        | -260        | -250        |
| 3                                           | Gross profit                               | 520         | 490         | 460         | 425         | 400         |
| 4                                           | Selling and administrative expenses        | -280        | -263        | -241        | -228        | -230        |
| 5                                           | Rental expenses                            | -130        | -67         | -64         | -62         | -60         |
| 6                                           | Net income                                 | 110         | 160         | 155         | 135         | 110         |
| <b>Statement of Financial Position</b>      |                                            |             |             |             |             |             |
| <b>Assets</b>                               |                                            | <b>20x5</b> | <b>20x4</b> | <b>20x3</b> | <b>20x2</b> | <b>20x1</b> |
| 7                                           | Cash                                       | 1,230       | 1,005       | 740         | 505         | 280         |
| 8                                           | Accounts receivable, net                   | 740         | 590         | 450         | 320         | 200         |
| 9                                           | Inventory                                  | 175         | 160         | 150         | 140         | 130         |
| 10                                          | Property, plant and equipment, net         | 650         | 750         | 850         | 940         | 1,020       |
| 11                                          | Intangible assets, net                     | 410         | 510         | 600         | 660         | 730         |
| 12                                          | Other assets                               | 325         | 272         | 204         | 152         | 110         |
| 13                                          | Total assets                               | 3,530       | 3,287       | 2,994       | 2,717       | 2,470       |
| <b>Liabilities and shareholders' equity</b> |                                            |             |             |             |             |             |
| 14                                          | Accounts payable                           | 750         | 620         | 490         | 370         | 260         |
| 15                                          | Rental expenses payable                    | 70          | 67          | 64          | 62          | 60          |
| 16                                          | Share capital                              | 1,500       | 1,500       | 1,500       | 1,500       | 1,500       |
| 17                                          | Retained earnings                          | 1,100       | 940         | 785         | 650         | 540         |
| 18                                          | Net income                                 | 110         | 160         | 155         | 135         | 110         |
| 19                                          | Total liabilities and shareholders' equity | 3,530       | 3,287       | 2,994       | 2,717       | 2,470       |

| <b>Statement of Cash Flows</b> |                                                |             |             |             |             | Million<br>Baht |             |
|--------------------------------|------------------------------------------------|-------------|-------------|-------------|-------------|-----------------|-------------|
| <b>Line</b>                    | <b>Operating Cash Flows</b>                    | <b>20x6</b> | <b>20x5</b> | <b>20x4</b> | <b>20x3</b> | <b>20x2</b>     | <b>20x1</b> |
| 20                             | Net income                                     |             | 110         | 160         | 155         | 135             | 110         |
| 21                             | Add depreciation                               |             | 100         | 100         | 90          | 80              | 80          |
| 22                             | amortization                                   |             | 100         | 90          | 60          | 70              | 70          |
| 23                             | (Increase) decrease in account receivable      |             | -150        | -140        | -130        | -120            | -110        |
| 24                             | (Increase) decrease in inventory               |             | -15         | -10         | -10         | -10             | -10         |
| 25                             | (Increase) decrease in other assets            |             | -53         | -68         | -52         | -42             | -50         |
| 26                             | Increase (decrease) in account payable         |             | 130         | 130         | 120         | 110             | 120         |
| 27                             | Increase (decrease) in rental expenses payable |             | 3           | 3           | 2           | 2               | -           |
| 28                             | Cash flows from operating activities           |             | 225         | 265         | 235         | 225             | 210         |

**Note:** For the ease of references, we provide only cash flow from operation.

## Case 4: Direct method / Cash expenses

Million  
Baht

| <b>Income Statement</b>                     |                                            | <b>20x5</b> | <b>20x4</b> | <b>20x3</b> | <b>20x2</b> | <b>20x1</b> |
|---------------------------------------------|--------------------------------------------|-------------|-------------|-------------|-------------|-------------|
| <b>Line</b>                                 |                                            |             |             |             |             |             |
| 1                                           | Sales                                      | 850         | 790         | 740         | 685         | 650         |
| 2                                           | Cost of sales                              | -330        | -300        | -280        | -260        | -250        |
| 3                                           | Gross profit                               | 520         | 490         | 460         | 425         | 400         |
| 4                                           | Selling and administrative expense         | -280        | -263        | -241        | -228        | -230        |
| 5                                           | Rental expenses                            | -130        | -67         | -64         | -62         | -60         |
| 6                                           | Net income                                 | 110         | 160         | 155         | 135         | 110         |
| <b>Statement of Financial Position</b>      |                                            |             |             |             |             |             |
| <b>Assets</b>                               |                                            | <b>20x5</b> | <b>20x4</b> | <b>20x3</b> | <b>20x2</b> | <b>20x1</b> |
| 7                                           | Cash                                       | 1,230       | 1,005       | 740         | 505         | 280         |
| 8                                           | Accounts receivable, net                   | 740         | 590         | 450         | 320         | 200         |
| 9                                           | Inventory                                  | 175         | 160         | 150         | 140         | 130         |
| 10                                          | Property, plant and equipment, net         | 650         | 750         | 850         | 940         | 1,020       |
| 11                                          | Intangible assets, net                     | 410         | 510         | 600         | 660         | 730         |
| 12                                          | Other assets                               | 325         | 272         | 204         | 152         | 110         |
| 13                                          | Total assets                               | 3,530       | 3,287       | 2,994       | 2,717       | 2,470       |
| <b>Liabilities and shareholders' equity</b> |                                            |             |             |             |             |             |
| 14                                          | Accounts payable                           | 750         | 620         | 490         | 370         | 260         |
| 15                                          | Rental expenses payable                    | 70          | 67          | 64          | 62          | 60          |
| 16                                          | Share capital                              | 1,500       | 1,500       | 1,500       | 1,500       | 1,500       |
| 17                                          | Retained earnings                          | 1,100       | 940         | 785         | 650         | 540         |
| 18                                          | Net income                                 | 110         | 160         | 155         | 135         | 110         |
| 19                                          | Total liabilities and shareholders' equity | 3,530       | 3,287       | 2,994       | 2,717       | 2,470       |

| <b>Statement of Cash Flows</b> |                                      | Million<br>Baht |                     |                     |                   |                   |                   |
|--------------------------------|--------------------------------------|-----------------|---------------------|---------------------|-------------------|-------------------|-------------------|
| <b>Line</b>                    | <b>Operating Cash Flows</b>          | <b>20x6</b>     | <b>20x5</b>         | <b>20x4</b>         | <b>20x3</b>       | <b>20x2</b>       | <b>20x1</b>       |
| 20                             | Cash receipt from customers          |                 | 700                 | 650                 | 610               | 565               | 540               |
| 21                             | Cash payment to suppliers            |                 | - 215               | - 180               | - 170             | - 160             | - 140             |
| 22                             | Cash payment for rental expenses     |                 | - 127               | - 64                | - 62              | - 60              | - 60              |
| 23                             | Cash payment for other expenses      |                 | - 133               | - 141               | - 143             | - 120             | - 130             |
| 24                             | Cash flows from operating activities |                 | <u>225</u>          | <u>265</u>          | <u>235</u>        | <u>225</u>        | <u>210</u>        |
|                                | Net cash increase (decrease)         |                 | 225                 | 265                 | 235               | 225               | 210               |
| 25                             | Beginning cash                       |                 | <u>1,005</u>        | <u>740</u>          | <u>505</u>        | <u>280</u>        | <u>70</u>         |
| 26                             | Ending cash                          |                 | <u><u>1,230</u></u> | <u><u>1,005</u></u> | <u><u>740</u></u> | <u><u>505</u></u> | <u><u>280</u></u> |

**Note:** For the ease of references, we provide only cash flow from operation.

## **[Experimental Instrument for Experiment 3]**

### **Instrument for the revenues cases**

**Case 1: Indirect method / Accrued revenues**

**Case 2: Direct method / Accrued revenues**

**Case 3: Indirect method / Cash revenues**

**Case 4: Direct method / Cash revenues**

[This is instrument for Cases 1 and 2]

In this exercise, we would like you to analyze the enclosed case as an investor. Please answer the questions in the given sequence.

**Please indicate the time now: \_\_\_\_\_**

### **Background Information**

#### **ADVANCE INC. BACKGROUND INFORMATION**

##### **BUSINESS**

The Company's principal products are household products and appliances

##### **MARKETS AND DISTRIBUTIONS**

The major markets for Advance's products are to domestic and foreign customers. The Company's suppliers are plastic, wood and metal manufacturers in Thailand and China.

##### **FINANCE AND OPERATIONS**

The company has experienced growing operating incomes over the past years and management expects continuing sales growth in the future. The company's CEO is planning to expand the factory to increase the production capacity in order to satisfy increasing orders from both domestic and overseas customers. We have been renting out our commercial building to a property investment company since 20x1.

In April 20x5, one of our customers (the customer) experienced severe flooding that affected its warehouse and, because of that, the customer temporarily rented one of our warehouses for eight months during the fiscal year. The rental revenues receivable (from the customer) were accrued in the same year (20x5) and would be received in cash in 20x6. The customer vacated the premises at the end of 20x5.

## Case 1: Indirect method / Accrued revenues

|                                             |                                            | Million<br>Baht |       |       |       |       |
|---------------------------------------------|--------------------------------------------|-----------------|-------|-------|-------|-------|
| <b>Income Statement</b>                     |                                            |                 |       |       |       |       |
| Line                                        |                                            | 20x5            | 20x4  | 20x3  | 20x2  | 20x1  |
| 1                                           | Sales                                      | 850             | 790   | 740   | 685   | 650   |
| 2                                           | Cost of sales                              | -330            | -300  | -280  | -260  | -250  |
| 3                                           | Gross profit                               | 520             | 490   | 460   | 425   | 400   |
| 4                                           | Selling and administrative expenses        | -420            | -397  | -369  | -352  | -350  |
| 5                                           | Rental revenues                            | 130             | 67    | 64    | 62    | 60    |
| 6                                           | Net income                                 | 230             | 160   | 155   | 135   | 110   |
| <b>Statement of Financial Position</b>      |                                            |                 |       |       |       |       |
| <b>Assets</b>                               |                                            |                 |       |       |       |       |
|                                             |                                            | 20x5            | 20x4  | 20x3  | 20x2  | 20x1  |
| 7                                           | Cash                                       | 1,290           | 1,005 | 740   | 505   | 280   |
| 8                                           | Accounts receivable, net                   | 740             | 590   | 450   | 320   | 200   |
| 9                                           | Inventory                                  | 175             | 160   | 150   | 140   | 130   |
| 10                                          | Rental revenues receivable                 | 130             | 67    | 64    | 62    | 60    |
| 11                                          | Property, plant and equipment, net         | 650             | 750   | 850   | 940   | 1,020 |
| 12                                          | Intangible assets, net                     | 410             | 510   | 600   | 660   | 730   |
| 13                                          | Other assets                               | 255             | 205   | 140   | 90    | 50    |
| 14                                          | Total assets                               | 3,650           | 3,287 | 2,994 | 2,717 | 2,470 |
| <b>Liabilities and shareholders' equity</b> |                                            |                 |       |       |       |       |
| 15                                          | Accounts payable                           | 750             | 620   | 490   | 370   | 260   |
| 16                                          | Other liabilities                          | 70              | 67    | 64    | 62    | 60    |
| 17                                          | Share capital                              | 1,500           | 1,500 | 1,500 | 1,500 | 1,500 |
| 18                                          | Retained earnings                          | 1,100           | 940   | 785   | 650   | 540   |
| 19                                          | Net income                                 | 230             | 160   | 155   | 135   | 110   |
| 20                                          | Total liabilities and shareholders' equity | 3,650           | 3,287 | 2,994 | 2,717 | 2,470 |

**Statement of Cash Flows**Million  
Baht

|             |                                                   | <b>20X6</b> | <b>20x5</b> | <b>20x4</b> | <b>20x3</b> | <b>20x2</b> | <b>20x1</b> |
|-------------|---------------------------------------------------|-------------|-------------|-------------|-------------|-------------|-------------|
| <b>Line</b> | Operating Cash Flows                              |             |             |             |             |             |             |
| 21          | Net income                                        |             | 230         | 160         | 155         | 135         | 110         |
| 22          | Add depreciation                                  |             | 100         | 100         | 90          | 80          | 80          |
| 23          | amortization                                      |             | 100         | 90          | 60          | 70          | 70          |
| 24          | (Increase) decrease in account receivable         |             | -150        | -140        | -130        | -120        | -110        |
| 25          | (Increase) decrease in inventory                  |             | -15         | -10         | -10         | -10         | -10         |
| 26          | (Increase) decrease in rental revenues receivable |             | -63         | -3          | -2          | -2          | 0           |
| 27          | (Increase) decrease in other assets               |             | -50         | -65         | -50         | -40         | -50         |
| 28          | Increase (decrease) in account payable            |             | 130         | 130         | 120         | 110         | 120         |
| 29          | Increase (decrease) in other liabilities          |             | 3           | 3           | 2           | 2           | -           |
| 30          | Cash flows from operating activities              |             | 285         | 265         | 235         | 225         | 210         |

**Note:** For the ease of references, we provide only cash flow from operation.

# **Section A**



8) Indicate your confidence with respect to your estimate of Advance Inc.'s operating cash flow in Question 1 (*Circle a number*).



9) To what extent did you find it difficult to predict Advance Inc.'s 20x6 operating cash flow? (*Circle a number*)



**When you are done, please insert this sheet into the envelope. Then begin completing Section B.**

# **Section B**

**SECTION B**

3) Please estimate all of the following accounts for the year 20x6 (*Fill in the blank*).

i) Sales (Line item 1) = \_\_\_\_\_  
In the space below, show the basis for your answer above.

.....  
.....  
.....  
.....  
.....

j) Rental revenues (Line item 5) = \_\_\_\_\_  
In the space below, show the basis for your answer above.

.....  
.....  
.....  
.....  
.....

k) Accounts receivable (Line item 8) = \_\_\_\_\_  
In the space below, show the basis for your answer above.

.....  
.....  
.....  
.....  
.....

l) Rental revenues receivable (Line item 10) = \_\_\_\_\_  
In the space below, show the basis for your answer above.

.....  
.....  
.....  
.....  
.....  
.....

**Please indicate the time now:** \_\_\_\_\_

**When you are done, please insert this sheet into the envelope. Then begin completing Section C.**

# **Section C**

**SECTION C**

3. Please indicate what accounting method Advance Inc. used to prepare the operating cash flow (*Circle one*).

- f) Direct method
- g) Indirect method

**Please turn to the next page.**

**Please answer the following background information about yourself.**

What is your gender? (*Circle one*) Male / Female

1. What is your occupation? (*Fill in the blank*) \_\_\_\_\_

2. How many years of working experience do you have? (*Fill in the blank*) \_\_\_\_\_  
years

3. In the space below, indicate the number of courses you have taken or currently enrolled in:

Accounting: \_\_\_\_\_ courses

Finance: \_\_\_\_\_ courses

4. How frequently do you read companies' earnings releases (or announcements)? (*Circle a number*)

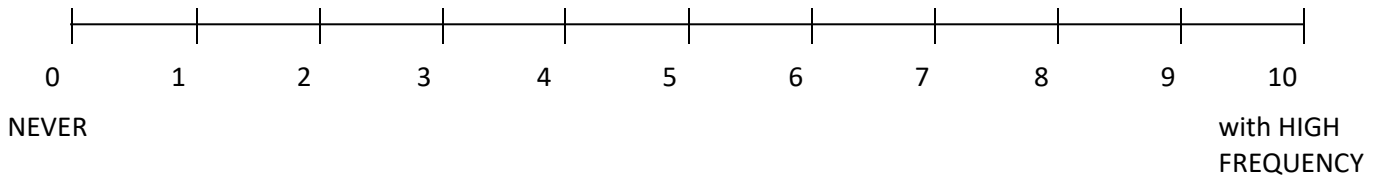

5. How frequently do you read companies' annual reports? (*Circle a number*)

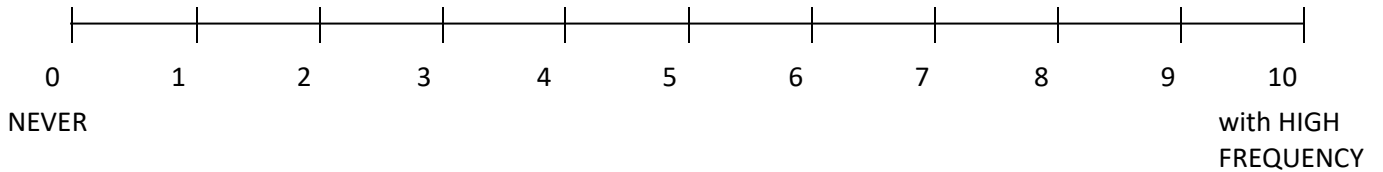

6. Have you ever invested in the stock market? (*Circle one*) YES / NO

If your answer is "yes," how many times have you done that? \_\_\_\_\_ times

If your answer is "no," do you intend to do it in the future? YES / NO

**Case 2: Direct method / Accrued revenues**Million  
Baht

| <b>Income Statement</b>                     |                                            | <b>20x5</b> | <b>20x4</b> | <b>20x3</b> | <b>20x2</b> | <b>20x1</b> |
|---------------------------------------------|--------------------------------------------|-------------|-------------|-------------|-------------|-------------|
| <b>Line</b>                                 |                                            |             |             |             |             |             |
| 1                                           | Sales                                      | 850         | 790         | 740         | 685         | 650         |
| 2                                           | Cost of sales                              | -330        | -300        | -280        | -260        | -250        |
| 3                                           | Gross profit                               | 520         | 490         | 460         | 425         | 400         |
| 4                                           | Selling and administrative expenses        | -420        | -397        | -369        | -352        | -350        |
| 5                                           | Rental revenues                            | 130         | 67          | 64          | 62          | 60          |
| 6                                           | Net income                                 | 230         | 160         | 155         | 135         | 110         |
| <b>Statement of Financial Position</b>      |                                            |             |             |             |             |             |
| <b>Assets</b>                               |                                            | <b>20x5</b> | <b>20x4</b> | <b>20x3</b> | <b>20x2</b> | <b>20x1</b> |
| 7                                           | Cash                                       | 1,290       | 1,005       | 740         | 505         | 280         |
| 8                                           | Accounts receivable, net                   | 740         | 590         | 450         | 320         | 200         |
| 9                                           | Inventory                                  | 175         | 160         | 150         | 140         | 130         |
| 10                                          | Rental revenues receivable                 | 130         | 67          | 64          | 62          | 60          |
| 11                                          | Property, plant and equipment, net         | 650         | 750         | 850         | 940         | 1,020       |
| 12                                          | Intangible assets, net                     | 410         | 510         | 600         | 660         | 730         |
| 13                                          | Other assets                               | 255         | 205         | 140         | 90          | 50          |
| 14                                          | Total assets                               | 3,650       | 3,287       | 2,994       | 2,717       | 2,470       |
| <b>Liabilities and shareholders' equity</b> |                                            |             |             |             |             |             |
| 15                                          | Accounts payable                           | 750         | 620         | 490         | 370         | 260         |
| 16                                          | Other liabilities                          | 70          | 67          | 64          | 62          | 60          |
| 17                                          | Share capital                              | 1,500       | 1,500       | 1,500       | 1,500       | 1,500       |
| 18                                          | Retained earnings                          | 1,100       | 940         | 785         | 650         | 540         |
| 19                                          | Net income                                 | 230         | 160         | 155         | 135         | 110         |
| 20                                          | Total liabilities and shareholders' equity | 3,650       | 3,287       | 2,994       | 2,717       | 2,470       |

| <b>Statement of Cash Flows</b> |                                      | Million<br>Baht |             |             |             |             |             |
|--------------------------------|--------------------------------------|-----------------|-------------|-------------|-------------|-------------|-------------|
| <b>Line</b>                    | Operating Cash Flows                 | <b>20X6</b>     | <b>20x5</b> | <b>20x4</b> | <b>20x3</b> | <b>20x2</b> | <b>20x1</b> |
| 21                             | Cash receipt from customers          |                 | 700         | 650         | 610         | 565         | 540         |
| 22                             | Cash receipt from rental revenues    |                 | 67          | 64          | 62          | 60          | 60          |
| 23                             | Cash payment to suppliers            |                 | -215        | -180        | -170        | -160        | -140        |
| 24                             | Cash payment for other expenses      |                 | -267        | -269        | -267        | -240        | -250        |
| 25                             | Cash flows from operating activities |                 | 285         | 265         | 235         | 225         | 210         |
|                                | Net cash increase (decrease)         |                 | 285         | 265         | 235         | 225         | 210         |
| 26                             | Beginning cash                       |                 | 1,005       | 740         | 505         | 280         | 70          |
| 27                             | Ending cash                          |                 | 1,290       | 1,005       | 740         | 505         | 280         |

**Note:** For the ease of references, we provide only cash flow from operation.

[This is instrument for Cases 3 and 4]

In this exercise, we would like you to analyze the enclosed case as an investor.

Please answer the questions in the given sequence.

Please indicate the time now: \_\_\_\_\_

### **Background Information**

#### **ADVANCE INC. BACKGROUND INFORMATION**

##### **BUSINESS**

The Company's principal products are household products and appliances.

##### **MARKETS AND DISTRIBUTIONS**

The major markets for Advance's products are to domestic and foreign customers. The Company's suppliers are plastic, wood and metal manufacturers in Thailand and China.

##### **FINANCE AND OPERATIONS**

The company has experienced growing operating incomes over the past years and management expects continuing sales growth in the future. The company's CEO is planning to expand the factory to increase the production capacity in order to satisfy increasing orders from both domestic and overseas customers. We have been renting out our commercial building to a property investment company since 20x1.

In April 20x5, one of our customers (the customer) experienced severe flooding that affected its warehouse and, because of that, the customer temporarily rented one of our warehouses for eight months during the fiscal year. The rental revenues (from the customer) were received in cash in the same year (20x5). The customer vacated the premises at the end of 20x5.

### Case 3: Indirect method / Cash revenues

Million  
Baht

| <b>Income Statement</b>                     |                                            | <b>20x5</b> | <b>20x4</b> | <b>20x3</b> | <b>20x2</b> | <b>20x1</b> |
|---------------------------------------------|--------------------------------------------|-------------|-------------|-------------|-------------|-------------|
| <b>Line</b>                                 |                                            |             |             |             |             |             |
| 1                                           | Sales                                      | 850         | 790         | 740         | 685         | 650         |
| 2                                           | Cost of sales                              | -330        | -300        | -280        | -260        | -250        |
| 3                                           | Gross profit                               | 520         | 490         | 460         | 425         | 400         |
| 4                                           | Selling and administrative expenses        | -420        | -397        | -369        | -352        | -350        |
| 5                                           | Rental revenues                            | 130         | 67          | 64          | 62          | 60          |
| 6                                           | Net income                                 | 230         | 160         | 155         | 135         | 110         |
| <b>Statement of Financial Position</b>      |                                            |             |             |             |             |             |
| <b>Assets</b>                               |                                            | <b>20x5</b> | <b>20x4</b> | <b>20x3</b> | <b>20x2</b> | <b>20x1</b> |
| 7                                           | Cash                                       | 1,350       | 1,005       | 740         | 505         | 280         |
| 8                                           | Accounts receivable, net                   | 740         | 590         | 450         | 320         | 200         |
| 9                                           | Inventory                                  | 175         | 160         | 150         | 140         | 130         |
| 10                                          | Rental revenues receivable                 | 70          | 67          | 64          | 62          | 60          |
| 11                                          | Property, plant and equipment, net         | 650         | 750         | 850         | 940         | 1,020       |
| 12                                          | Intangible assets, net                     | 410         | 510         | 600         | 660         | 730         |
| 13                                          | Other assets                               | 255         | 205         | 140         | 90          | 50          |
| 14                                          | Total assets                               | 3,650       | 3,287       | 2,994       | 2,717       | 2,470       |
| <b>Liabilities and shareholders' equity</b> |                                            |             |             |             |             |             |
| 15                                          | Accounts payable                           | 750         | 620         | 490         | 370         | 260         |
| 16                                          | Other liabilities                          | 70          | 67          | 64          | 62          | 60          |
| 17                                          | Share capital                              | 1,500       | 1,500       | 1,500       | 1,500       | 1,500       |
| 18                                          | Retained earnings                          | 1,100       | 940         | 785         | 650         | 540         |
| 19                                          | Net income                                 | 230         | 160         | 155         | 135         | 110         |
| 20                                          | Total liabilities and shareholders' equity | 3,650       | 3,287       | 2,994       | 2,717       | 2,470       |

| <b>Statement of Cash Flows</b> |                                                      |             |             |             |             | Million<br>Baht |             |
|--------------------------------|------------------------------------------------------|-------------|-------------|-------------|-------------|-----------------|-------------|
| <b>Line</b>                    | <b>Operating Cash Flows</b>                          | <b>20x6</b> | <b>20x5</b> | <b>20x4</b> | <b>20x3</b> | <b>20x2</b>     | <b>20x1</b> |
| 21                             | Net income                                           |             | 230         | 160         | 155         | 135             | 110         |
| 22                             | Add depreciation                                     |             | 100         | 100         | 90          | 80              | 80          |
| 23                             | amortization                                         |             | 100         | 90          | 60          | 70              | 70          |
| 24                             | (Increase) decrease in account<br>receivable         |             | -150        | -140        | -130        | -120            | -110        |
| 25                             | (Increase) decrease in inventory                     |             | -15         | -10         | -10         | -10             | -10         |
| 26                             | (Increase) decrease in rental revenues<br>receivable |             | -3          | -3          | -2          | -2              | 0           |
| 27                             | (Increase) decrease in other assets                  |             | -50         | -65         | -50         | -40             | -50         |
| 28                             | Increase (decrease) in account<br>payable            |             | 130         | 130         | 120         | 110             | 120         |
| 29                             | Increase (decrease) in other liabilities             |             | 3           | 3           | 2           | 2               | -           |
| 30                             | Cash flows from operating activities                 |             | <u>345</u>  | <u>265</u>  | <u>235</u>  | <u>225</u>      | <u>210</u>  |

**Note:** For the ease of references, we provide only cash flow from operation.

## Case 4: Direct method / Cash revenues

Million  
Baht

| <b>Income Statement</b> |                                     |             |             |             |             |             |
|-------------------------|-------------------------------------|-------------|-------------|-------------|-------------|-------------|
| <b>Line</b>             |                                     | <b>20x5</b> | <b>20x4</b> | <b>20x3</b> | <b>20x2</b> | <b>20x1</b> |
| 1                       | Sales                               | 850         | 790         | 740         | 685         | 650         |
| 2                       | Cost of sales                       | -330        | -300        | -280        | -260        | -250        |
| 3                       | Gross profit                        | 520         | 490         | 460         | 425         | 400         |
| 4                       | Selling and administrative expenses | -420        | -397        | -369        | -352        | -350        |
| 5                       | Rental revenues                     | 130         | 67          | 64          | 62          | 60          |
| 6                       | Net income                          | 230         | 160         | 155         | 135         | 110         |

### Statement of Financial Position

| <b>Assets</b>                               |                                            | <b>20x5</b> | <b>20x4</b> | <b>20x3</b> | <b>20x2</b> | <b>20x1</b> |
|---------------------------------------------|--------------------------------------------|-------------|-------------|-------------|-------------|-------------|
| 7                                           | Cash                                       | 1,350       | 1,005       | 740         | 505         | 280         |
| 8                                           | Accounts receivable, net                   | 740         | 590         | 450         | 320         | 200         |
| 9                                           | Inventory                                  | 175         | 160         | 150         | 140         | 130         |
| 10                                          | Rental revenues receivable                 | 70          | 67          | 64          | 62          | 60          |
| 11                                          | Property, plant and equipment, net         | 650         | 750         | 850         | 940         | 1,020       |
| 12                                          | Intangible assets, net                     | 410         | 510         | 600         | 660         | 730         |
| 13                                          | Other assets                               | 255         | 205         | 140         | 90          | 50          |
| 14                                          | Total assets                               | 3,650       | 3,287       | 2,994       | 2,717       | 2,470       |
| <b>Liabilities and shareholders' equity</b> |                                            |             |             |             |             |             |
| 15                                          | Accounts payable                           | 750         | 620         | 490         | 370         | 260         |
| 16                                          | Other liabilities                          | 70          | 67          | 64          | 62          | 60          |
| 17                                          | Share capital                              | 1,500       | 1,500       | 1,500       | 1,500       | 1,500       |
| 18                                          | Retained earnings                          | 1,100       | 940         | 785         | 650         | 540         |
| 19                                          | Net income                                 | 230         | 160         | 155         | 135         | 110         |
| 20                                          | Total liabilities and shareholders' equity | 3,650       | 3,287       | 2,994       | 2,717       | 2,470       |

| <b>Statement of Cash Flows</b> |                                      |             |             |             |             | Million<br>Baht |             |
|--------------------------------|--------------------------------------|-------------|-------------|-------------|-------------|-----------------|-------------|
| <b>Line</b>                    | <b>Operating Cash Flows</b>          | <b>20x6</b> | <b>20x5</b> | <b>20x4</b> | <b>20x3</b> | <b>20x2</b>     | <b>20x1</b> |
| 21                             | Cash receipt from customers          |             | 700         | 650         | 610         | 565             | 540         |
| 22                             | Cash receipt from rental revenues    |             | 127         | 64          | 62          | 60              | 60          |
| 23                             | Cash payment to suppliers            |             | -215        | -180        | -170        | -160            | -140        |
| 24                             | Cash payment for other expenses      |             | -267        | -269        | -267        | -240            | -250        |
| 25                             | Cash flows from operating activities |             | 345         | 265         | 235         | 225             | 210         |
|                                | Net cash increase (decrease)         |             | 345         | 265         | 235         | 225             | 210         |
| 26                             | Beginning cash                       |             | 1,005       | 740         | 505         | 280             | 70          |
| 27                             | Ending Cash                          |             | 1,350       | 1,005       | 740         | 505             | 280         |

**Note:** For the ease of references, we provide only cash flow from operation.

**Instrument for the expenses case**  
**Case 5: Indirect method / Accrued expenses**  
**Case 6: Direct method / Accrued expenses**  
**Case 7: Indirect method / Cash expenses**  
**Case 8: Direct method / Cash expenses**

[This is instrument for Cases 5 and 6]

In this exercise, we would like you to analyze the enclosed case as an investor.  
Please answer the questions in the given sequence.

**Please indicate the time now:** \_\_\_\_\_

### **Background Information**

#### **ADVANCE INC. BACKGROUND INFORMATION**

##### **BUSINESS**

The Company's principal products are household products and appliances.

##### **MARKETS AND DISTRIBUTIONS**

The major markets for Advance's products are to domestic and foreign customers. The Company's suppliers are plastic, wood and metal manufacturers in Thailand and China.

##### **FINANCE AND OPERATIONS**

The company has experienced growing operating incomes over the past years and management expects continuing sales growth in the future. The company's CEO is planning to expand the factory to increase the production capacity in order to satisfy increasing orders from both domestic and overseas customers. We have been renting a commercial building from a property investment company for our office since 20x1.

In April 20x5, we experienced severe flooding that affected our warehouses and, because of that, we temporarily rented one of our customers' warehouses for eight months during the fiscal year. The rental expenses payable (to the customer) were accrued in the same year (20x5) and would be paid in cash in 20x6. We vacated the premises at the end of 20x5.

## Case 5: Indirect method / Accrued expenses

|                                             |                                            | Million<br>Baht |             |             |             |             |
|---------------------------------------------|--------------------------------------------|-----------------|-------------|-------------|-------------|-------------|
| <b>Income Statement</b>                     |                                            |                 |             |             |             |             |
| Line                                        |                                            | 20x5            | 20x4        | 20x3        | 20x2        | 20x1        |
| 1                                           | Sales                                      | 850             | 790         | 740         | 685         | 650         |
| 2                                           | Cost of sales                              | -330            | -300        | -280        | -260        | -250        |
| 3                                           | Gross profit                               | 520             | 490         | 460         | 425         | 400         |
| 4                                           | Selling and administrative expenses        | -280            | -263        | -241        | -228        | -230        |
| 5                                           | Rental expenses                            | -130            | -67         | -64         | -62         | -60         |
| 6                                           | Net income                                 | 110             | 160         | 155         | 135         | 110         |
| <b>Statement of Financial Position</b>      |                                            |                 |             |             |             |             |
| <b>Assets</b>                               |                                            | <b>20x5</b>     | <b>20x4</b> | <b>20x3</b> | <b>20x2</b> | <b>20x1</b> |
| 7                                           | Cash                                       | 1,290           | 1,005       | 740         | 505         | 280         |
| 8                                           | Accounts receivable, net                   | 740             | 590         | 450         | 320         | 200         |
| 9                                           | Inventory                                  | 175             | 160         | 150         | 140         | 130         |
| 10                                          | Property, plant and equipment, net         | 650             | 750         | 850         | 940         | 1,020       |
| 11                                          | Intangible assets, net                     | 410             | 510         | 600         | 660         | 730         |
| 12                                          | Other assets                               | 325             | 272         | 204         | 152         | 110         |
| 13                                          | Total assets                               | 3,590           | 3,287       | 2,994       | 2,717       | 2,470       |
| <b>Liabilities and shareholders' equity</b> |                                            |                 |             |             |             |             |
| 14                                          | Accounts payable                           | 750             | 620         | 490         | 370         | 260         |
| 15                                          | Rental expenses payable                    | 130             | 67          | 64          | 62          | 60          |
| 16                                          | Share capital                              | 1,500           | 1,500       | 1,500       | 1,500       | 1,500       |
| 17                                          | Retained earnings                          | 1,100           | 940         | 785         | 650         | 540         |
| 18                                          | Net income                                 | 110             | 160         | 155         | 135         | 110         |
| 19                                          | Total liabilities and shareholders' equity | 3,590           | 3,287       | 2,994       | 2,717       | 2,470       |

| <b>Statement of Cash Flows</b> |                                                |             |             |             |             | Million<br>Baht |             |
|--------------------------------|------------------------------------------------|-------------|-------------|-------------|-------------|-----------------|-------------|
| <b>Line</b>                    | <b>Operating Cash Flows</b>                    | <b>20X6</b> | <b>20x5</b> | <b>20x4</b> | <b>20x3</b> | <b>20x2</b>     | <b>20x1</b> |
| 20                             | Net income                                     |             | 110         | 160         | 155         | 135             | 110         |
| 21                             | Add depreciation                               |             | 100         | 100         | 90          | 80              | 80          |
| 22                             | amortization                                   |             | 100         | 90          | 60          | 70              | 70          |
| 23                             | (Increase) decrease in account receivable      |             | -150        | -140        | -130        | -120            | -110        |
| 24                             | (Increase) decrease in inventory               |             | -15         | -10         | -10         | -10             | -10         |
| 25                             | (Increase) decrease in other assets            |             | -53         | -68         | -52         | -42             | -50         |
| 26                             | Increase (decrease) in account payable         |             | 130         | 130         | 120         | 110             | 120         |
| 27                             | Increase (decrease) in rental expenses payable |             | 63          | 3           | 2           | 2               | -           |
| 28                             | Cash flows from operating activities           |             | <b>285</b>  | <b>265</b>  | <b>235</b>  | <b>225</b>      | <b>210</b>  |

**Note:** For the ease of references, we provide only cash flow from operation.

## Case 6: Direct method / Accrued expenses

|                                             |                                            | Million<br>Baht |       |       |       |       |
|---------------------------------------------|--------------------------------------------|-----------------|-------|-------|-------|-------|
| <b>Income Statement</b>                     |                                            |                 |       |       |       |       |
| Line                                        |                                            | 20x5            | 20x4  | 20x3  | 20x2  | 20x1  |
| 1                                           | Sales                                      | 850             | 790   | 740   | 685   | 650   |
| 2                                           | Cost of sales                              | -330            | -300  | -280  | -260  | -250  |
| 3                                           | Gross profit                               | 520             | 490   | 460   | 425   | 400   |
| 4                                           | Selling and administrative expenses        | -280            | -263  | -241  | -228  | -230  |
| 5                                           | Rental expenses                            | -130            | -67   | -64   | -62   | -60   |
| 6                                           | Net income                                 | 110             | 160   | 155   | 135   | 110   |
| <b>Statement of Financial Position</b>      |                                            |                 |       |       |       |       |
| <b>Assets</b>                               |                                            |                 |       |       |       |       |
|                                             |                                            | 20x5            | 20x4  | 20x3  | 20x2  | 20x1  |
| 7                                           | Cash                                       | 1,290           | 1,005 | 740   | 505   | 280   |
| 8                                           | Accounts receivable, net                   | 740             | 590   | 450   | 320   | 200   |
| 9                                           | Inventory                                  | 175             | 160   | 150   | 140   | 130   |
| 10                                          | Property, plant and equipment, net         | 650             | 750   | 850   | 940   | 1,020 |
| 11                                          | Intangible assets, net                     | 410             | 510   | 600   | 660   | 730   |
| 12                                          | Other assets                               | 325             | 272   | 204   | 152   | 110   |
| 13                                          | Total assets                               | 3,590           | 3,287 | 2,994 | 2,717 | 2,470 |
| <b>Liabilities and shareholders' equity</b> |                                            |                 |       |       |       |       |
| 14                                          | Accounts payable                           | 750             | 620   | 490   | 370   | 260   |
| 15                                          | Rental expenses payable                    | 130             | 67    | 64    | 62    | 60    |
| 16                                          | Share capital                              | 1,500           | 1,500 | 1,500 | 1,500 | 1,500 |
| 17                                          | Retained earnings                          | 1,100           | 940   | 785   | 650   | 540   |
| 18                                          | Net income                                 | 110             | 160   | 155   | 135   | 110   |
| 19                                          | Total liabilities and shareholders' equity | 3,590           | 3,287 | 2,994 | 2,717 | 2,470 |

| <b>Statement of Cash Flows</b> |                                      |             |             |             |             | Million<br>Baht |             |
|--------------------------------|--------------------------------------|-------------|-------------|-------------|-------------|-----------------|-------------|
| <b>Line</b>                    | <b>Operating Cash Flows</b>          | <b>20x6</b> | <b>20x5</b> | <b>20x4</b> | <b>20x3</b> | <b>20x2</b>     | <b>20x1</b> |
| 20                             | Cash receipt from customers          |             | 700         | 650         | 610         | 565             | 540         |
| 21                             | Cash payment to suppliers            |             | -215        | -180        | -170        | -160            | -140        |
| 22                             | Cash payment for rental expenses     |             | -67         | -64         | -62         | -60             | -60         |
| 23                             | Cash payment for other expenses      |             | -133        | -141        | -143        | -120            | -130        |
| 24                             | Cash flows from operating activities |             | 285         | 265         | 235         | 225             | 210         |
|                                | Net cash increase (decrease)         |             | 285         | 265         | 235         | 225             | 210         |
| 25                             | Beginning cash                       |             | 1,005       | 740         | 505         | 280             | 70          |
| 26                             | Ending cash                          |             | 1,290       | 1,005       | 740         | 505             | 280         |

**Note:** For the ease of references, we provide only cash flow from operation.

[This is instrument for Cases 7 and 8]

In this exercise, we would like you to analyze the enclosed case as an investor.

Please answer the questions in the given sequence.

Please indicate the time now: \_\_\_\_\_

### **Background Information**

#### **ADVANCE INC. BACKGROUND INFORMATION**

##### **BUSINESS**

The Company's principal products are household products and appliances.

##### **MARKETS AND DISTRIBUTIONS**

The major markets for Advance's products are to domestic and foreign customers. The Company's suppliers are plastic, wood and metal manufacturers in Thailand and China.

##### **FINANCE AND OPERATIONS**

The company has experienced growing operating incomes over the past years and management expects continuing sales growth in the future. The company's CEO is planning to expand the factory to increase the production capacity in order to satisfy increasing orders from both domestic and overseas customers. We have been renting a commercial building from a property investment company for our office since 20x1.

In April 20x5, we experienced severe flooding that affected our warehouses and, because of that, we temporarily rented one of our customers' warehouses for eight months during the fiscal year. The rental expenses (to the customer) were paid in cash in the same year (20x5). We vacated the premises at the end of 20x5.

## Case 7: Indirect method / Cash expenses

Million Baht

| <b>Income Statement</b>                     |                                            | <b>20x5</b> | <b>20x4</b> | <b>20x3</b> | <b>20x2</b> | <b>20x1</b> |
|---------------------------------------------|--------------------------------------------|-------------|-------------|-------------|-------------|-------------|
| <b>Line</b>                                 |                                            |             |             |             |             |             |
| 1                                           | Sales                                      | 850         | 790         | 740         | 685         | 650         |
| 2                                           | Cost of sales                              | -330        | -300        | -280        | -260        | -250        |
| 3                                           | Gross profit                               | 520         | 490         | 460         | 425         | 400         |
| 4                                           | Selling and administrative expenses        | -280        | -263        | -241        | -228        | -230        |
| 5                                           | Rental expenses                            | -130        | -67         | -64         | -62         | -60         |
| 6                                           | Net income                                 | 110         | 160         | 155         | 135         | 110         |
| <b>Statement of Financial Position</b>      |                                            |             |             |             |             |             |
| <b>Assets</b>                               |                                            | <b>20x5</b> | <b>20x4</b> | <b>20x3</b> | <b>20x2</b> | <b>20x1</b> |
| 7                                           | Cash                                       | 1,230       | 1,005       | 740         | 505         | 280         |
| 8                                           | Accounts receivable, net                   | 740         | 590         | 450         | 320         | 200         |
| 9                                           | Inventory                                  | 175         | 160         | 150         | 140         | 130         |
| 10                                          | Property, plant and equipment, net         | 650         | 750         | 850         | 940         | 1,020       |
| 11                                          | Intangible assets, net                     | 410         | 510         | 600         | 660         | 730         |
| 12                                          | Other assets                               | 325         | 272         | 204         | 152         | 110         |
| 13                                          | Total assets                               | 3,530       | 3,287       | 2,994       | 2,717       | 2,470       |
| <b>Liabilities and shareholders' equity</b> |                                            |             |             |             |             |             |
| 14                                          | Accounts payable                           | 750         | 620         | 490         | 370         | 260         |
| 15                                          | Rental expenses payable                    | 70          | 67          | 64          | 62          | 60          |
| 16                                          | Share capital                              | 1,500       | 1,500       | 1,500       | 1,500       | 1,500       |
| 17                                          | Retained earnings                          | 1,100       | 940         | 785         | 650         | 540         |
| 18                                          | Net income                                 | 110         | 160         | 155         | 135         | 110         |
| 19                                          | Total liabilities and shareholders' equity | 3,530       | 3,287       | 2,994       | 2,717       | 2,470       |

| <b>Statement of Cash Flows</b> |                                                |             |             |             |             | Million<br>Baht |             |
|--------------------------------|------------------------------------------------|-------------|-------------|-------------|-------------|-----------------|-------------|
| Operating Cash Flows           |                                                | <b>20x6</b> | <b>20x5</b> | <b>20x4</b> | <b>20x3</b> | <b>20x2</b>     | <b>20x1</b> |
| <b>Line</b>                    |                                                |             |             |             |             |                 |             |
| 20                             | Net income                                     |             | 110         | 160         | 155         | 135             | 110         |
| 21                             | Add depreciation                               |             | 100         | 100         | 90          | 80              | 80          |
| 22                             | amortization                                   |             | 100         | 90          | 60          | 70              | 70          |
| 23                             | (Increase) decrease in account receivable      |             | -150        | -140        | -130        | -120            | -110        |
| 24                             | (Increase) decrease in inventory               |             | -15         | -10         | -10         | -10             | -10         |
| 25                             | (Increase) decrease in other assets            |             | -53         | -68         | -52         | -42             | -50         |
| 26                             | Increase (decrease) in account payable         |             | 130         | 130         | 120         | 110             | 120         |
| 27                             | Increase (decrease) in rental expenses payable |             | 3           | 3           | 2           | 2               | -           |
| 28                             | Cash flows from operating activities           |             | <u>225</u>  | <u>265</u>  | <u>235</u>  | <u>225</u>      | <u>210</u>  |

**Note:** For the ease of references, we provide only cash flow from operation.

## Case 8: Direct method / Cash expenses

Million  
Baht

| <b>Income Statement</b>                     |                                            | <b>20x5</b> | <b>20x4</b> | <b>20x3</b> | <b>20x2</b> | <b>20x1</b> |
|---------------------------------------------|--------------------------------------------|-------------|-------------|-------------|-------------|-------------|
| <b>Line</b>                                 |                                            |             |             |             |             |             |
| 1                                           | Sales                                      | 850         | 790         | 740         | 685         | 650         |
| 2                                           | Cost of sales                              | -330        | -300        | -280        | -260        | -250        |
| 3                                           | Gross profit                               | 520         | 490         | 460         | 425         | 400         |
| 4                                           | Selling and administrative expense         | -280        | -263        | -241        | -228        | -230        |
| 5                                           | Rental expenses                            | -130        | -67         | -64         | -62         | -60         |
| 6                                           | Net income                                 | 110         | 160         | 155         | 135         | 110         |
| <b>Statement of Financial Position</b>      |                                            |             |             |             |             |             |
| <b>Assets</b>                               |                                            | <b>20x5</b> | <b>20x4</b> | <b>20x3</b> | <b>20x2</b> | <b>20x1</b> |
| 7                                           | Cash                                       | 1,230       | 1,005       | 740         | 505         | 280         |
| 8                                           | Accounts receivable, net                   | 740         | 590         | 450         | 320         | 200         |
| 9                                           | Inventory                                  | 175         | 160         | 150         | 140         | 130         |
| 10                                          | Property, plant and equipment, net         | 650         | 750         | 850         | 940         | 1,020       |
| 11                                          | Intangible assets, net                     | 410         | 510         | 600         | 660         | 730         |
| 12                                          | Other assets                               | 325         | 272         | 204         | 152         | 110         |
| 13                                          | Total assets                               | 3,530       | 3,287       | 2,994       | 2,717       | 2,470       |
| <b>Liabilities and shareholders' equity</b> |                                            |             |             |             |             |             |
| 14                                          | Accounts payable                           | 750         | 620         | 490         | 370         | 260         |
| 15                                          | Rental expenses payable                    | 70          | 67          | 64          | 62          | 60          |
| 16                                          | Share capital                              | 1,500       | 1,500       | 1,500       | 1,500       | 1,500       |
| 17                                          | Retained earnings                          | 1,100       | 940         | 785         | 650         | 540         |
| 18                                          | Net income                                 | 110         | 160         | 155         | 135         | 110         |
| 19                                          | Total liabilities and shareholders' equity | 3,530       | 3,287       | 2,994       | 2,717       | 2,470       |

| <b>Statement of Cash Flows</b> |                                      |             |              |              |             | Million Baht |             |
|--------------------------------|--------------------------------------|-------------|--------------|--------------|-------------|--------------|-------------|
| <b>Line</b>                    | <b>Operating Cash Flows</b>          | <b>20x6</b> | <b>20x5</b>  | <b>20x4</b>  | <b>20x3</b> | <b>20x2</b>  | <b>20x1</b> |
| 20                             | Cash receipt from customers          |             | 700          | 650          | 610         | 565          | 540         |
| 21                             | Cash payment to suppliers            |             | - 215        | - 180        | - 170       | - 160        | - 140       |
| 22                             | Cash payment for rental expenses     |             | - 127        | - 64         | - 62        | - 60         | - 60        |
| 23                             | Cash payment for other expenses      |             | - 133        | - 141        | - 143       | - 120        | - 130       |
| 24                             | Cash flows from operating activities |             | <u>225</u>   | <u>265</u>   | <u>235</u>  | <u>225</u>   | <u>210</u>  |
|                                | Net cash increase (decrease)         |             | 225          | 265          | 235         | 225          | 210         |
| 25                             | Beginning cash                       |             | <u>1,005</u> | <u>740</u>   | <u>505</u>  | <u>280</u>   | <u>70</u>   |
| 26                             | Ending cash                          |             | <u>1,230</u> | <u>1,005</u> | <u>740</u>  | <u>505</u>   | <u>280</u>  |

**Note:** For the ease of references, we provide only cash flow from operation.
